# Supplementary material for: Malnutrition is common in Ugandan children with cerebral palsy, particularly those over the age of five and those who had neonatal complications
Source: PubMed Central journal article supplement — Acta Paediatr. 2015 Aug 7;104(12):1259–68. doi: 10.1111/apa.13089 (PMC5042112; doi:10.1111/apa.13089), 2015-08-07
Supplement: APA-104-1259-s002.pdf [file APA-104-1259-s002.pdf]

**Supporting Information Table 1: Definition of anthropometric indicators. Z-scores of -2.0 or lower were used as threshold values.**

| <b>INDICATOR</b>   | <b>DEFINITION</b>                   |
|--------------------|-------------------------------------|
| <b>Stunting</b>    | Height-for-age (HAZ)                |
| <b>Underweight</b> | Weight-for-age (WAZ)                |
| <b>Wasting</b>     | Weight-for-height (WHZ)             |
| <b>Thinness</b>    | Body mass index (BMI)-for-age (BAZ) |
