# Supplementary figures and images for: Malnutrition is common in Ugandan children with cerebral palsy, particularly those over the age of five and those who had neonatal complications
Source: PubMed Central journal article supplement — Acta Paediatr. 2015 Aug 7;104(12):1259–68. doi: 10.1111/apa.13089 (PMC5042112; doi:10.1111/apa.13089), 2015-08-07

**FIGURE 1**

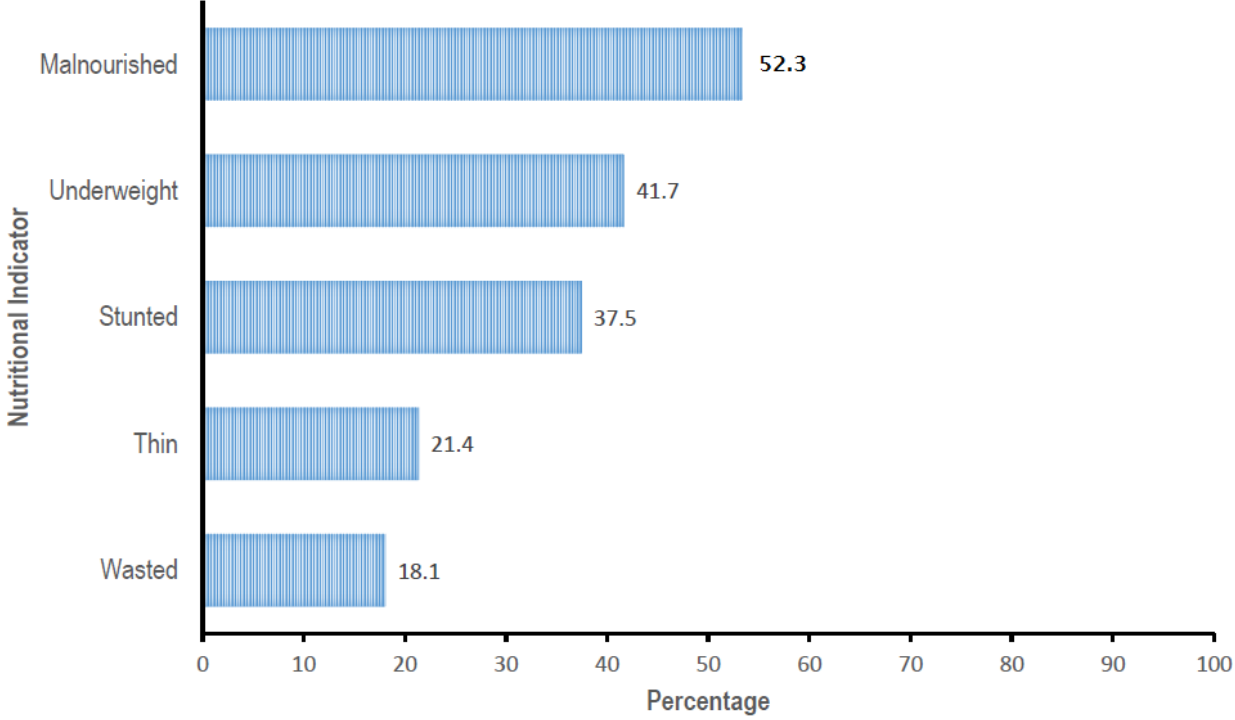

Supplement: APA-104-1259-s001.pdf [file APA-104-1259-s001.pdf]
